# Supplementary material for: Deep learning-based analysis of 12-lead electrocardiograms in school-age children: a proof of concept study
Source: Front Cardiovasc Med. 2025 Mar 5;12:1471989. doi: 10.3389/fcvm.2025.1471989 (PMC11919894; doi:10.3389/fcvm.2025.1471989)
Supplement: Supplementary file 1 [file Datasheet1.xlsx]

## Sheet: Sup Table 1
	Category	Finding	Group	Code No.	Criteria
1	Q wave abnormality	Broad Q wave	A	1-1-1	|Q|/R ≥1/3 and Q ≥0.03 sec (any one of lead I, II, V2 to V6)
				1-1-2	Q ≥0.04 sec (any one of lead I, II, V1 to V6)
				1-1-4	QIII ≥0.05 sec, and |Q aVF| ≥0.1 mV
				1-1-5	Q aVF ≥0.05 sec
			B	1-1-3	Q aVL ≥0.04 sec, and R aVL ≥0.3 mV
				1-2-2	0.03≤Q<0.04 sec (any one of lead I, II, V2 to V6)
				1-2-4	0.04≤QIII<0.05 sec, and |Q aVF| ≥0.1 mV
				1-2-5	0.04≤Q aVF<0.05 sec
		QS pattern	A	1-1-6	QS pattern when initial R-wave is present in adjacent right precordial leads (any one of lead V2 to V6)
				1-1-7	QS pattern (all leads in V1 to V4, or all leads in V1 to V5)
				1-1-8	QS pattern (lead V6)
				1-2-3	QS pattern (lead I or II)
				1-2-7	QS pattern (all leads in V1 to V3)
				1-3-6	QS pattern (leads III and aVF)
		Deep Q wave	A	1-4-1	|QV5| < |QV6|, and |QV6| ≥0.5 mV
			B	1-2-6	|Q| ≥0.5 mV (lead III or aVF)
		Other Q wave findings	A	1-5-1	qR(S) pattern (lead V1)
2	QRS axis abnormality		B	2-1-0	-90°< QRS axis ≤ -30°
				2-4-1	-180° < QRS axis ≤ -90°
3	ST-T abnormality	ST junction and ST segment abnormality	A	4-1-1	ST-J depression ≥ 0.2 mV, and flat or down-sloping ST segment (any one of lead I, II, aVL, aVF, or V1 to V6)
				4-1-2	0.1 ≤ ST-J depression < 0.2 mV, and flat or down-sloping ST segment (any one of lead I, II, aVL, aVF, or V1 to V6)
				4-2-1	0.05 ≤ ST-J depression < 0.1 mV and flat or down-sloping ST segment (any one of lead I, II, aVL, aVF, or V1 to V6) (girls in junior and senior high schools with this finding only in lead aVF are categorized to Group B)
			B	4-3-1	ST-J depression < 0.05 mV, down-sloping ST segment, and depression of ≥ 0.05 mV from baseline at ST segment or the lowest point of T wave (any one of lead I, II, aVL, or V2 to V6)
				4-4-1	ST-J depression > 0.2 mV, and up-sloping or U-shaped ST segment (any one of lead I, II, aVL, or V1 to V6) (girls in junior and senior high schools with this finding only in lead aVF are categorized to Group C)
		T wave abnormality	A	5-1-1	Negative, or biphasic T wave with negative deflection ≥ 0.5 mV (any one of lead I, II, aVL [R ≥ 0.5 mV], aVF [mainly positive QRS], or V3 to V6) (any one lead of V4 to V6 in precordial leads in elementary school students)
				5-2-1	Negative, or biphasic T wave with negative deflection ≥ 0.1 mV and < 0.5 mV (any one of lead I, II, aVL [R ≥ 0.5 mV], aVF [mainly positive QRS], or V4 to V6) (those with findings only in lead aVF are categorized to Group B)
			B	5-3-1	Flat (0), negative, or biphasic (± type) T wave with negative deflection < 0.1 mV (flat or down-sloping ST segment) (any one of lead I, II, aVL [R ≥ 0.5 mV], V5, or V6) (girls in junior or senior high schools with this finding are categorized to Group C)
				5-6-1	Positive TV1, RV1 ≥ |SV1| (only in students in the first year of elementary school or younger)
4	Third-degree artioventricular block		A	6-1-0	Third degree (complete) atrioventricular block
5	Second-degree atrioventricular block		A	6-2-1	Second degree atrioventricular block (Mobitz type II)
				6-2-2	Second degree atrioventricular block (2:1)
				6-2-3	Second degree atrioventricular block (Wenckebach type)
6	First-degree atrioventricular block		A	6-3-0	PR interval > 0.28 sec
				6-3-1	PR interval > 0.24 sec (only in elementary school students; Junior/senior high school students with the same finding are categorized to Group B)
7	Complete left bundle branch block		A	7-1-1	Complete left bundle branch block: QRS duration ≥ 0.12 sec, and VAT ≥ 0.06 sec (any one of lead I, II, aVL, V5, or V6) with no Q wave
				7-1-2	Complete left bundle branch block: QRS duration ≥ 0.10 sec, and VAT ≥ 0.05 sec (any one of lead I, II, aVL, V5, or V6) with no Q wave (only in elementary school students)
				7-1-3	Intermittent complete left bundle branch block
8	Complete right bundle branch block		A	7-2-1	Complete right bundle branch block: QRS duration ≥ 0.12 sec, and R’>R and VAT ≥ 0.06 sec (lead V1, or V2)
				7-2-2	Complete right bundle branch block: QRS duration ≥ 0.10 sec, and R’>R and VAT ≥ 0.05 sec (lead V1, or V2) (only in elementary school students)
				7-2-3	Intermittent complete right bundle branch block
9	Incomplete right bundle branch block		A	7-3-1	Incomplete right bundle branch block: 7-3-0 and R’V1 ≥ |SV1| (only in junior and senior high school students)
				7-3-3	Incomplete right bundle branch block: 7-3-2 and R’V1 ≥ |SV1|
			B	7-3-0	Incomplete right bundle branch block: QRS duration < 0.12 sec, and R’ > R (lead V1, or V2) (only in junior and senior high school students)
				7-3-2	Incomplete right bundle branch block: QRS duration < 0.10 sec, and R’ > R (lead V1, or V2)
10	Incomplete left bundle branch block		A	7-6-0	Incomplete left bundle branch block: 0.10 ≤ QRS duration < 0.12 sec, and R-R’ type and R’ ≥ R (lead V5, or V6) with no Q wave
				7-6-1	Incomplete left bundle branch block: QRS duration < 0.10 sec, and R-R’ type and R’ ≥ R (lead V5, or V6), with no Q wave (only in elementary school students)
11	Intraventricular conduction disturbance		A	7-4-0	Intraventricular conduction disturbance: QRS duration ≥ 0.12 sec
				7-4-1	Intraventricular conduction disturbance: QRS duration ≥0.10 sec (only in elementary school students)
12	Left anterior fascicular block		A	7-7-0	Left anterior fascicular block: QRS duration < 0.12 sec, and QI ≥ 0.025 mV, QI duration < 0.03 sec, and left axis deviation of -45° or more
				7-7-1	Left anterior fascicular block: QRS duration < 0.10 sec, and QI ≥ 0.025 mV, QI duration < 0.03 sec, and left axis deviation of -30° or more (only in elementary school students)
13	Bifascicular block		A	7-8-0	Bifascicular block: 7-2-1 and left axis deviation of -45° or more
				7-8-1	Bifascicular block: 7-2-1 and left axis deviation of -30° or more (only in elementary school students. Junior and senior high school students with this finding are categorized to Group C)
14	Premature supraventricular contractions		A	8-1-4	Multiform premature supraventricular contractions
			B	8-1-1	Monomorphic premature supraventricular contractions (Sporadic cases are categorized to Group C)
15	Premature ventricular contractions		A	8-1-2	Monomorphic premature ventricular contractions
				8-1-3	8-1-1 plus 8-1-2
				8-1-5	Polymorphic premature ventricular contractions
				8-1-6	Premature ventricular contraction coupletes
				8-1-7	R on T type ventricular premature contraction
				8-1-8	Premature ventricular contractions followed by abnormal T waves
16	Sinus arrest or sinoatrial block		A	8-5-1	Sinus arrest or sinoatrial block
17	Supraventricular tachyarrhythmia	Supraventricular tachycardia	A	8-4-1	Supraventricular tachycardia
		Atrial fibrillation	A	8-3-1	Atrial fibrillation
		Atrial flutter	A	8-3-2	Atrial flutter
		Atrial flutter/fibrillation	A	8-3-3	Atrial flutter/fibrillation
18	Ventricular tachycardia		A	8-2-1	Ventricular tachycardia
19	Sinus tachycardia or bradycardia	Sinus tachycardia	A	8-7-1	Heart rate (≥ 200 bpm)
				8-7-2	Heart rate (≥ 180 bpm)
			B	8-7-3	Heart rate (≥ 150 bpm)
				8-7-4	Heart rate ≥ 140 bpm (only in junior and senior high school students. Elementary school students with this finding are categorized to Group C)
		Sinus bradycardia	A	8-8-1	Heart rate (< 40 bpm)
				8-8-2	Heart rate < 45 bpm (only in elementary school students. Junior and senior high school students with this finding are categorized to Group C)
20	Other rhythm abnormality	Idioventricular rhythm	A	8-2-2	Idioventricular rhythm
		Junctional rhythm	B	8-6-1	Junctional rhythm
		Atrioventricular dissociation	B	8-6-2	Atrioventricular dissociation
		Escape beats or escape rhythm	B	8-6-3	Escape beats or escape rhythm
		Other arrhythmias	A	8-9-9	Arrhythmias not otherwise specified
21	Right ventricular hypertrophy				Defined in Supplemental Table 3
22	Left ventricular hypertrophy				Defined in Supplemental Table 4
23	Low voltage		B	9-1-0	Low voltage: QRS < 0.5 mV (all leads of I, II, and III) or QRS < 1.0 mV (all leads of V1 to V6)
24	Left atrial load		B	9-3-1	P ≥ 0.30 mV (any one of lead II, III, aVF, or V1)
				9-3-3	P duration ≥ 0.12 sec (any one of lead I, II, or aVL)
				9-3-4	P duration ≥ 0.10 sec (any one of lead I, II, or aVL) (only in elementary school students. Junior and senior high school students with this finding are categorized to Group C)
				9-3-5	9-3-3 or 9-3-4 (only in elementary school students), biphasic P wave and positive duration < negative duration (in lead V1 or V2)
25	Dextrocardia		A	9-6-1	Dextrocardia
26	WPW		A	6-4-1	WPW-type ECG: PR interval < 0.12 sec and QRS duration ≥ 0.12 sec and VAT > 0.06 sec (any one of lead I, II, aVL, V4, V5, or V6)
				6-4-2	WPW-type ECG: PR interval <0.10 sec and QRS duration ≥0.10 sec and VAT >0.05 sec (any one of lead I, II, aVL, V4, V5, or V6) (only in elementary school students)
				6-4-3	WPW-type ECG (intermittent)
27	QT prolongation		A	9-7-1	QT prolongation: There have been no screening criteria for QT prolongation by using automatic ECG analysis regarding school screening. In this guideline document, QT prolongation is defined as a QTc of ≥ 0.45 sec obtained using the Fridericia correction. (QTc obtained in automatic ECG analysis is often about 20 msec longer than that obtained with the tangent method.) If QT prolongation is suspect…
28	Brugada-type electrocardiogram		A	9-2-2	Brugada type ECG: Coved ST elevation in right precordial leads (ST elevation ≥ 0.2 mV at the J point in any one of lead V1, V2 or V3, and coved type ST-T cahnge)
			B	9-2-3	Brugada type ECG: Saddleback ST elevation in right precordial leads (ST elevation ≥0.2 mV at the J point in any of leads V1, V2 or V3, and saddleback type ST-T change)
29	Artificial pacemaker		A	6-8-0	Artificial pacemaker
30	Reexamination is required		A	9-8-0	ECG is unreadable due to baseline drift, alternate current interference, artifacts from electromyogram or other technical errors

## Sheet: Sup Table 2
		3 to 11 years of age	≥ 12 years of age
Points	Findings		Males	Females
5 points	(1) Patterns of right precordial leads
	1) qRS, qR or R type in any one of lead V4R, V3R or V1	+	+	+
	2) Positive T wave and R > |S| in lead V1	*	*	*
3 points	(2) High R wave in right precordial leads
	1) RV1	≥ 2.0 mV	≥ 2.0 mV	≥ 1.5 mV
	2) R < R’ in V1, and R’V1 is:	≥ 1.0 mV	≥ 1.0 mV	≥ 1.0 mV
	3) R > |S| in V1, and RV1 is:	≥ 1.5 mV	≥ 1.5 mV	≥ 1.0 mV
2 points	(3) Deep S wave in left precordial leads
	1) |SV6|	≥ 1.0 mV	≥ 1.0 mV	≥ 1.0 mV
	2) R ≤ |S| and |SV6| in lead V6	≥ 0.5 mV	≥ 0.5 mV	≥ 0.5 mV
	(4) Long VAT in right precordial leads: VAT V1	≥ 0.035 sec	≥ 0.035 sec	≥ 0.035 sec
1 point	(5) Right axis deviation: QRS electrical axis	≥ 120°	≥ 120°	≥ 120°

## Sheet: Sup Table 3
			3 to 11 years of age	≥ 12 years of age
Points	Findings			Males	Females
5 points	(1) ST-T changes suggestive of hypertrophy in left precordial leads		+	+	+
3 points	(2) High R wave in left precordial leads	1) RV6	≥3.0 mV	≥ 3.0 mV	≥ 2.5 mV
3 points		2) RV5	≥ 4.0 mV	≥ 4.0 mV	≥ 3.5 mV
	(3) Deep S wave in right precordial leads	1) |SV1|+RV6	≥ 5.0 mV	≥ 5.0 mV	≥ 4.0 mV
		2) |SV1|+RV5	≥ 6.5 mV	≥ 6.0 mV	≥ 5.0 mV
		3) |SV1|	*	*	*
	(4) Deep Q wave in left precordial leads	|QV5|<|QV6| and |QV6|	≥ 0.5 mV	≥ 0.5 mV	≥ 0.5 mV
2 points	(5) High R wave in lead II, III, or aVF	1) R II and R III	≥ 2.5 mV	≥ 2.5 mV	≥ 2.5 mV
		2) RaVF	≥ 2.5 mV	≥ 2.5 mV	≥ 2.5 mV
	(6) Long VAT in left precordial leads	V5 or V6	≥0.05 sec	≥ 0.06 sec	≥ 0.06 sec
1 point	(7) Left axis deviation	QRS electrical axis	≤ 0°	≤ -30°	≤ -30°

## Sheet: Sup Table 4
Code	Definition
1-1-1	Q/R amplitude ratio ≥ 1/3, plus Q duration ≥ 0.03 s in lead I or V6.
1-1-1	Q/R amplitude ratio ≥ 1/3, plus Q duration ≥ 0.03 s in lead II.
1-1-1	Q/R amplitude ratio ≥ 1/3 plus Q duration ≥ 0.03 s in any of leads V2, V3, V4, V5.
1-1-2	Q duration ≥ 0.04 s* in lead I or V6.
1-1-2	Q duration ≥ 0.04 s in lead II.
1-1-2	Q duration ≥ 0.04 s in any of leads V1, V2, V3, V4, V5.
1-1-3	Q duration ≥ 0.04 s plus R amplitude ≥ 3 mm in lead aVL.
1-1-3	Q duration ≥ 0.05 s in lead III, plus a Q-wave amplitude ≥ 1.0 mm in the majority of beats in lead aVF.
1-1-4	Q duration ≥ 0.05 s in lead aVF.
1-1-6	QS pattern when initial R-wave is present in adjacent lead to the right on the chest, in any of leads V2, V3, V4, V5, V6.
1-1-7	QS pattern in all of leads V1-V4 or V1-V5
1-2-2	Q duration ≥ 0.03 s and < 0.04 s in lead I or V6.
1-2-2	Q duration ≥ 0.03 s and < 0.04 s in lead II.
1-2-2	Q duration ≥ 0.03 s and < 0.04 s in any of leads V2, V3, V4, V5.
1-2-3	QS pattern in lead I. Do not code in the presence of 7-1-1.
1-2-3	QS pattern in lead II. Do not code in the presence of 7-1-1.
1-2-4	Q duration ≥ 0.04 s and < 0.05 s in lead III, plus a Q-wave ≥ 1.0 mm amplitude in the majority of beats in aVF.
1-2-5	Q duration ≥ 0.04 s and < 0.05 s in lead aVF.
1-2-6	Q amplitude ≥ 5.0 mm in leads III or aVF.
1-2-7	QS pattern in all of leads V1, V2, and V3. (Do not code in the presence of 7-1-1.)
1-3-6	QS pattern in each of leads III and aVF. (Do not code in the presence of 7-1-1.)
3-4	Criteria for 3-1 and 3-2 both present.
4-1-1	STJ depression ≥ 2.0 mm and ST segment horizontal or downward sloping in any of leads I, aVL, or V6.
4-1-1	STJ depression ≥ 2.0 mm and ST segment horizontal or downward sloping in lead II or aVF.
4-1-1	STJ depression ≥ 2.0 mm and ST segment horizontal or downward sloping in any of leads V1, V2, V3, V4, V5.
4-1-2	STJ depression ≥ 1.0 mm but < 2.0 mm, and ST segment horizontal or downward sloping in any of leads I, aVL, or V6.
4-1-2	STJ depression ≥ 1.0 mm but < 2.0 mm and ST segment horizontal or downward sloping in lead II or aVF.
4-1-2	STJ depression ≥ 1.0 mm but < 2.0 mm and ST segment horizontal or downward sloping in any of leads V1, V2, V3, V4, V5.
4-2	STJ depression ≥ 0.5 mm but < 1.0 mm and ST segment horizontal or downward sloping in any of leads I, aVL, or V6.
4-2	STJ depression ≥ 0.5 mm but < 1.0 mm and ST segment horizontal or downward sloping in lead II or aVF.
4-2	STJ depression ≥ 0.5 mm but < 1.0 mm and ST segment horizontal or downward sloping in any of leads V1, V2, V3, V4, V5.
4-3	No STJ depression as much as 0.5 mm, but ST segment downward sloping and segment or T-wave nadir ≥ 0.5 mm below P-R baseline, in any of leads I, aVL, or V6.
4-3	No STJ depression as much as 0.5 mm, but ST segment downward sloping and segment or T-wave nadir ≥ 0.5 mm below P-R baseline in lead II.
4-3	No STJ depression as much as 0.5 mm, but ST segment downward sloping and segment or T-wave nadir ≥ 0.5 mm below P-R baseline in any of leads V2, V3, V4, V5.
4-4	STJ depression ≥ 1.0 mm and ST segment upward sloping or U-shaped, in any of leads I, aVL, or V6.
4-4	STJ depression ≥ 1.0 mm and ST segment upward sloping, or U-shaped, in lead II.
4-4	STJ depression ≥ 1.0 mm and ST segment upward sloping or U-shaped in any of leads V1, V2, V3, V4, V5.
5-1	T amplitude negative 5.0 mm or more in either of leads I, V6, or in lead aVL when R amplitude is ≥ 5.0 mm.
5-1	T amplitude negative 5.0 mm or more in lead II, or in lead aVF when QRS is mainly upright.
5-1	T amplitude negative 5.0 mm or more in any of leads V2, V3, V4, V5.
5-2	T amplitude negative or diphasic (positive–negative or negative–positive type) with negative phase at least 1.0 mm but not as deep as 5.0 mm in lead I or V6, or in lead aVL when R amplitude is ≥ 5.0 mm.
5-2	T amplitude negative or diphasic with negative phase (negative–positive or positive– negative type) at least 1.0 mm but not as deep as 5.0 mm in lead II, or in lead aVF when QRS is mainly upright.
5-2	T amplitude negative, or diphasic (negative–positive or positive–negative type) with negative phase at least 1.0 mm but not as deep as 5.0 mm, in any of leads V2, V3, V4, V5.
5-3	T amplitude zero (ﬂat), or negative, or diphasic (negative–positive type only) with less than 1.0 mm negative phase in lead I or V6, or in lead aVL when R amplitude is ≥ 5.0 mm.
5-3	T amplitude zero (ﬂat), or negative, or diphasic (negative-positive type only) with less than 1.0 mm negative phase in lead II; not coded in lead aVF.
5-3	T amplitude zero (ﬂat), or negative, or diphasic (negative–positive type only) with less than 1.0 mm negative phase, in any of leads V3, V4, V5.
5-4	T amplitude positive and T/R amplitude ratio < 1/20 in any of leads I, aVL, V6; R wave amplitude must be ≥ 10.0 mm.
5-4	T amplitude positive and T/R amplitude ratio < 1/20 in lead II; R wave amplitude must be ≥ 10.0 mm.
5-4	T amplitude positive and T/R amplitude ratio < 1/20 in any of leads V3, V4, V5; R wave amplitude must be ≥ 10.0 mm.
5-5	Other negative T waves.
6-1	Complete (third degree) A-V block (permanent or intermittent) in any lead. Atrial and ventricular complexes independent, and atrial rate faster than ventricular rate, with ventricular rate < 60.
6-2-1	Mobitz Type II (occurrence of P-wave on time with dropped QRS and T).
6-2-2	Partial (second degree) A-V block in any lead (2:1 or 3:1 block).
6-2-3	Wenckebach’s Phenomenon (P-R interval increasing from beat to beat until QRS and T dropped).
6-3	P-R (P-Q) interval ≥ 0.22 s in the majority of beats in any of leads I, II, III, aVL, aVF.
6-4-1	Wolff-Parkinson-White Pattern (WPW), persistent. Sinus P-wave. P-R interval < 0.12 s, plus QRS duration ≥ 0.12 s, plus R peak duration ≥ 0.06 s, coexisting in the same beat and present in the majority of beats in any of leads I, II, aVL, V4, V5, V6. (6-4-1 suppresses 1-2-3, 1-2-7, 1-3-2, 1-3-6, 1-3-8, all 3, 4, 5, 7, 9-2, 9-4, 9-5 codes.)
6-4-2	WPW Pattern, intermittent. WPW pattern in ≤ 50% of beats in appropriate leads.
6-8	Electronic pacemaker.
7-1-1	Complete left bundle branch block (LBBB). (Do not code in presence of 6-1, 6-4-1, 6-8, 8-2-1 or 8-2-2.) QRS duration ≥ 0.12 s in a majority of beats (of the same QRS pattern) in any of leads I, II, III, aVL, aVF, plus R peak duration ≥ 0.06 s in a majority of beats (of the same QRS pattern) in any of leads I, II, aVL, V5, V6. (7-1-1 suppresses 1-2-3, 1-2-7, 1-3-2, 1-3-6, 1-3-7, 1-3-8, all 2, 3, 4…
7-1-2	Intermittent left bundle branch block. Same as 7-1-1 but with presence of normally conducted QRS complexes of different shape than the LBBB pattern.
7-2-1	Complete right bundle branch block (RBBB). (Do not code in the presence of 6-1, 6-4-1, 6-8, 8-2-1 or 8-2-2.) QRS duration ≥ 0.12 s in a majority of beats (of the same QRS pattern) in any of leads I, II, III, aVL, aVF, plus: R΄ > R in V1; or QRS mainly upright, plus R peak duration ≥ 0.06 s in V1 or V2; or S duration > R duration in all beats in lead I or II. (Suppresses 1-3-8, all 2-, 3-, 4-and 5…
7-2-2	Intermittent right bundle branch block. Same as 7-2-1 but with presence of normally conducted QRS complexes of different shape than the RBBB pattern.
7-3	Incomplete right bundle branch block. QRS duration < 0.12 s in each of leads I, II, III, aVL, aVF, and R΄ > R in either of leads V1, V2 (Code as 3-2 in addition if those criteria are met. 7-3 suppresses code 1-3-8.)
7-4	Intraventricular block. QRS duration ≥ 0.12 s in a majority of beats in any of leads I, II, III, aVL, aVF. (7-4 suppresses all 2, 3, 4, 5, 9-2, 9-4, 9-5 codes.)
7-5	R-R΄ pattern in either of leads V1, V2 with R΄ amplitude ≤ R.
7-6	Incomplete left bundle branch block. (Do not code in the presence of any codable Q- or QS-wave.) QRS duration ≥ 0.10 s and < 0.12 s in the majority of beats of each of leads I, aVL, and V5 or V6.
7-7	Left anterior hemiblock (LAH). QRS duration < 0.12 s in the majority of beats in leads I, II,III, aVL, aVF, plus Q-wave amplitude ≥ 0.25 mm and < 0.03 s duration in lead I or aVL, plus left axis deviation of –45° or more negative. (In presence of 7-2, code 7-8 if axis is < – 45° and the Q-wave in lead I meets the above criteria.)
7-8	Combination of 7-7 and 7-2.
8-1-1	Presence of any atrial or junctional premature beats.
8-1-2	Presence of any ventricular premature beats.
8-1-3	Presence of both atrial and/or junctional premature beats and ventricular premature beats.
8-1-5	Presence of 8-1-2 and 8-1-4.
8-2-1	Ventricular ﬁbrillation or ventricular asystole.
8-2-2	Persistent ventricular (idioventricular) rhythm.
8-2-3	Intermittent ventricular tachycardia. Three or more consutive ventricular premature beats occurring at a rate ≥ 100. This includes more persistent ventricular tachycardia.
8-2-4	Ventricular parasystole (should not be coded in presence of 8-3-1).
8-3-1	Atrial ﬁbrillation (persistent).
8-3-2	Atrial ﬂutter (persistent).
8-3-3	Intermittent atrial ﬁbrillation (code if 3 or more clear-cut, consutive sinus beats are present in any lead).
8-3-4	Intermittent atrial ﬂutter (code if 3 or more clear-cut, consutive sinus beats are present in any lead).
8-4-1	Supraventricular rhythm persistent. QRS duration < 0.12 s; and absent P-waves or presence of abnormal P-waves (inverted or ﬂat in II, III and aVF); and regular rhythm.
8-4-2	Supraventricular tachycardia intermittent. Three consutive atrial or junctional pre- mature beats occurring at a rate ≥ 100.
8-5-1	Sinoatrial arrest. Unexpected absence of P, QRS and T, plus a R-R interval at a ﬁxed multiple of the normal interval, ±10%.
8-5-2	Sinoatrial block. Unexpected absence of P, QRS and T, preceded by progressive shortening of P-P intervals. (R-R interval at a fi xed multiple of the normal interval, ± 10%.)8-6-1 A-V dissociation
8-6-1	A-V dissociation with ventricular pacemaker (without capture). Requires: P-P and R-R occur at variable rates with ventricular rate as fast as or faster than the atrial rate, plus variable P-R intervals, plus no capture beats.
8-6-2	A-V dissociation with ventricular pacemaker (with capture).
8-6-3	A-V dissociation with atrial pacemaker (without capture).
8-6-4	A-V dissociation with atrial pacemaker (with capture).
9-2	ST segment elevation ≥ 1.0 mm in any of leads I, aVL, V6.
9-2	ST segment elevation ≥ 1.0 mm in any of leads II, III, aVF.
9-2	ST segment elevation ≥ 1.0 mm in lead V5 or ST segment elevation ≥ 2.0 mm in any of leads V1, V2, V3, V4.
9-3	P-wave amplitude ≥ 2.5 mm in any of leads II, III, aVF, in a majority of beats.
9-5	T-wave amplitude > 12 mm in any of leads I, II, III, aVL, aVF, V1, V2, V3, V4, V5, V6. (Do not code in the presence of 6-4-1, 6-8, 7-1-1, 7-2-1, 7-4, or 7-8.)
9-8-1	Poor Quality/Technical problems which interfere with coding.
9-8-2	Technical problems that do not interfere with coding.
